# Supplementary material for: Measurement report: Analysis of aerosol optical depth variation at Zhongshan Station in Antarctica
Source: Copernicus journal article supplement (doi:10.5194/egusphere-2024-798), 2024-07-25
Supplement: Supplementary file [file egusphere-2024-798-AC3-supplement.pdf]

**Anonymous Referee #2**

The study offers a comprehensive analysis of AOD and AE variations at Zhongshan Station in Antarctica (where is unnoticed area in the community), providing valuable insights into seasonal and diurnal trends of these aerosol parameters. The authors have effectively utilized multiple data sources and analysis techniques to draw conclusions about the influence of meteorological factors, aerosol sources, and particle size dynamics on AOD and AE. Although the analysis looks simple, this research provide new in situ data and an important advancement on aerosol behavior in the Antarctic region, where the observation is very sparse and very hard to carry out. Thus I suggest acceptance after minor revision.

**Respond:**

Thank you very much for your positive evaluation and comments on our research. We greatly appreciate your valuable suggestions and will carefully consider them during the revision process. Your inputs will contribute to enhancing the quality and depth of our study, particularly in the challenging context of sparse observations in the Antarctic region. Our research provides new in situ data and represents an important advancement in understanding aerosol behavior. We will make revisions based on your suggestions.

## Major:

1. The authors provide valuable insights into the relationship between particle size and AOD across different seasons. To strengthen the paper's cohesiveness, it would be beneficial to elaborate on the apparent seasonal differences in AOD variations. Specifically, clarifying how fine mode particles contribute to low AOD ranges while coarse mode particles are associated with high AOD values, and how this relationship evolves across seasons, would provide a more comprehensive understanding of the complex aerosol dynamics in the Antarctic environment.

## Respond:

We agree that it is important to provide a more detailed explanation of the seasonal variations in AOD and clarify how fine mode particles contribute to low AOD ranges while coarse mode particles are associated with high AOD values.

The following is the modification we made in Section 3.1:

Although fine mode particles have a longer suspension time in the atmosphere and can efficiently scatter and absorb sunlight, leading to lower AOD ranges, it is worth mentioning that in the coastal regions of Antarctica, the dominant role in AOD is sometimes played by coarse mode particles. These particles, with larger radii and higher volume concentrations, originate mainly from abundant sea salt sources. Their presence results in increased scattering and absorption of sunlight, emphasizing the significance of coarse mode particles in determining AOD levels in the Antarctic coastal areas (Su et al., 2022).

The reference is:

Su, Y., Han, Y., Luo, H., Zhang, Y., Shao, S., and Xie, X.: Physical-Optical Properties of Marine Aerosols over the South China Sea: Shipboard Measurements and MERRA-2 Reanalysis, Remote Sensing, 14, 2453, <https://doi.org/10.3390/rs14102453>, 2022.

2. The study offers an intriguing analysis of the influence of wind speed on aerosol dispersal, noting that higher wind speeds generally lead to lower AOD values. However, the authors also highlight the role of blowing snow over sea ice in

generating sea salt aerosols, contributing to winter peaks in sea salt aerosols. To further enrich the discussion, it would be valuable to expand on the interplay between wind speed and AOD during winter, considering both the dispersal and production of aerosols. This additional context would provide a more nuanced understanding of the complex relationships at play in this unique environment.

Respond:

According to your comments, we investigated the relationship between wind direction and wind speed with AOD during the winter season at Zhongshan Station (Figure 1). The results indicate that higher AOD values are primarily associated with northeast and southeast winds, while lower AOD values are correlated with southwest winds, suggesting significant contributions from the ocean and marginal ice areas. However, the correlation coefficient between AOD and wind speed is relatively low ( $R = 0.078$ ), with high AOD values observed across wind speeds ranging from 5 to 20 m/s. We acknowledge that the number of valid AOD observations during the winter season was limited, with only 98 data samples available for linear regression analysis with hourly wind direction and speed. This limitation may introduce considerable uncertainty, which is why we are not discussing winter now. If we want to obtain more reliable conclusions, we need to observe and accumulate enough valid data for a long time.

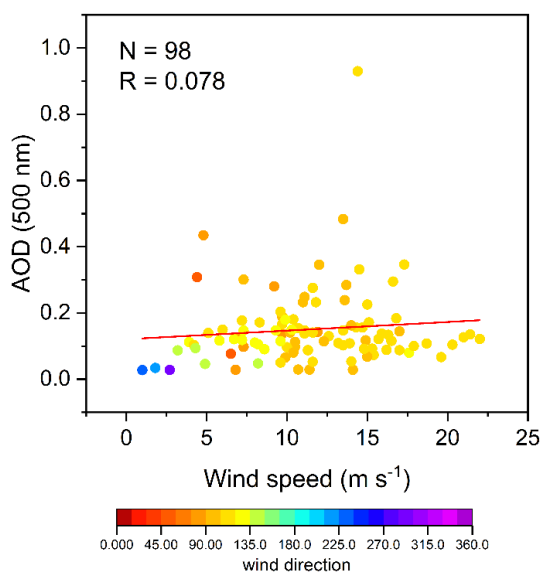

Figure 1. Relationship between AOD and wind direction and speed

3. Expanding the Discussion section to elaborate on how the observed AOD and AE variations relate to radiative forcing, cloud formation, and potential impacts on snow and ice melt in Antarctica. This would strengthen the study's significance by connecting the findings to broader climate-related processes.

Respond:

Agree. In the discussion section, we have added information about the interaction between Antarctic aerosol particles and clouds to highlight the importance of monitoring Antarctic aerosol optical properties.

#### 4.2 Potential effects of aerosol particles on cloud and radiative forcing

The optical properties of aerosols play a crucial role in their impact on radiative forcing, cloud formation, and local climate. In our analysis of the variations in AOD and AE, we provided insights into the aerosol loading, particle sizes, and possible formation and growth mechanisms in the atmosphere over Zhongshan Station. During winter and spring, coarse mode particles are predominantly derived from sea salt. Studies have shown that aerosols larger than  $0.13 \mu\text{m}$  in the marine boundary layer contain sea salt, contributing to most of the aerosol scattering and inducing cooling effects (Murphy et al., 1998). Additionally, the size and inhomogeneity of sea salt particles are often associated with relative humidity. Compared to remote oceans, the low relative humidity in coastal Antarctica may introduce more inhomogeneous sea salt particles, resulting in up to a 12% change in direct radiative forcing due to inhomogeneity (Wang et al., 2019).

However, we are particularly interested in the behavior of aerosol particles during summer since solar radiation is limited in winter. In summer and autumn, the increase in fine mode particles is closely related to the release of biogenic aerosols, such as DMS, emitted by phytoplankton in the marginal ice zone. When particles grow to a size suitable for cloud condensation nuclei or ice nucleating particles, they can affect the formation of low-level mixed-phase clouds in coastal areas, contributing to the formation of low-level ice clouds. At the same time, the increased number density of cloud droplets enhances cloud reflectivity, resulting in negative radiative forcing (Satheesh and Krishna Moorthy, 2005). A recent study revealed that in the shallow

mixed-phase clouds over Antarctica, the concentrations of cloud-relevant aerosol particles match the concentrations of ice crystals and cloud droplets (Radenz et al., 2024). the number of particles plays a crucial role in cloud growth. Increasing particle concentration results in a higher abundance of liquid droplets and ice crystals within clouds, which can impact cloud lifespan and potentially influence local weather and climate. Therefore, continuous monitoring of aerosol optical properties in coastal Antarctica is vital to improve our comprehension of aerosol radiative forcing variations caused by changes in aerosol loading and particle size.

The newly added references are:

Murphy, D. M., Anderson, J. R., Quinn, P. K., McInnes, L. M., Brechtel, F. J., Kreidenweis, S. M., Middlebrook, A. M., Pósfai, M., Thomson, D. S., and Buseck, P. R.: Influence of sea-salt on aerosol radiative properties in the Southern Ocean marine boundary layer, *Nature*, 392, 62–65, <https://doi.org/10.1038/32138>, 1998.

Radenz, M., Engelmann, R., Henning, S., Schmithüsen, H., Baars, H., Frey, M. M., Weller, R., Bühl, J., Jimenez, C., Roschke, J., Muser, L. O., Wullenweber, N., Zeppenfeld, S., Griesche, H., Wandinger, U., and Seifert, P.: Ground-based Remote Sensing of Aerosol, Clouds, Dynamics, and Precipitation in Antarctica —First results from the one-year COALA campaign at Neumayer Station III in 2023, <https://doi.org/10.1175/BAMS-D-22-0285.1>, 2024.

Satheesh, S. K. and Krishna Moorthy, K.: Radiative effects of natural aerosols: A review, *Atmospheric Environment*, 39, 2089–2110, <https://doi.org/10.1016/j.atmosenv.2004.12.029>, 2005.

Wang, Z., Bi, L., Yi, B., and Zhang, X.: How the Inhomogeneity of Wet Sea Salt Aerosols Affects Direct Radiative Forcing, *Geophysical Research Letters*, 46, 1805–1813, <https://doi.org/10.1029/2018GL081193>, 2019.

4. Addressing the potential impact of missing measurements and instrument downtime on the correlation analysis of AOD and AE with meteorological variables. Quantifying measurement uncertainty and discussing its implications for the interpretation of correlation coefficients would further enhance the study's rigor.

Respond:

In the data preprocessing stage, we systematically removed invalid data caused by instrument downtime, daily observations fewer than 20, and low solar elevation angles. However, according to the estimation of AOD uncertainty for CE318-T by Barreto et al. (2016), during daytime, the uncertainty primarily stems from the calibration term, with the field instrument AOD standard uncertainty ranging from  $\sim 0.015$ . For nighttime measurements, the AOD uncertainty depends on the calibration technique used. Specifically, when calibrated using the Moon Ratio technique, the AOD uncertainty ranges from 0.011 to 0.019. However, if the new Sun Ratio technique is applied, higher uncertainties are expected, specifically 0.012 to 0.015 (0.017) for the visible (440 nm) channels and 0.015 to 0.021 for longer wavelengths. Additionally, for instruments calibrated using the new Sun-Moon gain factor technique and using a Langley-calibrated instrument for G calculation, the uncertainties range from 0.016 to 0.019. We will include an explanation of the on-site CE318-T AOD uncertainty in Section 2.2.

The following is the modification we made in Section 2.2:

It should be noted that there are uncertainties in the AOD measurements of CE318-T during field observations due to atmospheric conditions, instrument noise, and calibration. It is estimated that during daytime measurements, the AOD uncertainty ranges from 0.010 to 0.021. For night-time measurements, the AOD uncertainty depends on the calibration technique used. Specifically, when calibrated using the Moon Ratio technique, the uncertainty ranges from 0.011 to 0.019. With the application of the new Sun Ratio technique, the uncertainty for the 440 nm channel is between 0.012 and 0.015 (0.017), while for longer wavelengths, it ranges from 0.015 to 0.021. By employing the new Sun-Moon gain factor technique and using the Langley-calibrated instrument for calculation of the amplification between daytime and night-time measurements, the uncertainty range is from 0.016 to 0.019 (Barreto et al., 2016).

The reference is:

Barreto, Á., Cuevas, E., Granados-Muñoz, M.-J., Alados-Arboledas, L., Romero, P. M., Gröbner, J., Kouremeti, N., Almansa, A. F., Stone, T., Toledano, C., Román, R., Sorokin, M., Holben, B., Canini, M., and Yela, M.: The new sun-sky-lunar Cimel CE318-T

multiband photometer - a comprehensive performance evaluation, Atmospheric Measurement Techniques, 9, 631–654, <https://doi.org/10.5194/amt-9-631-2016>, 2016.

**Minor:**

1. Line 54-55, line 122, and line 314: when describing the values of AOD and AE, it is suggested to unify the number of decimal places to improve accuracy.

Respond:

Thank you for your detailed review. We will follow your suggestion to unify the number of decimal places for the values of AOD and AE mentioned in lines 54-55, 122, and 314 to improve accuracy. The following is our changes in manuscript:

Line 54-55: AOD observation records from Antarctica sites indicate that the values range from 0.006 to 0.220 in coastal regions and from 0.007 to 0.034 in inland regions.

Line 122: The monthly mean AOD values at 500 nm ( $AOD_{500\text{ nm}}$ ) generally remained below 0.10, consistent with findings by Gadhavi and Achuthan at the Maitri Station, where AOD variation fell within the range of 0.01 to 0.10 (Gadhavi and Achuthan, 2004).

Line 314: A weak positive correlation was noted between temperature and AOD ( $R = 0.22$ ,  $p = 0.40$ ), and a negative correlation between relative humidity and AOD ( $R = -0.59$ ,  $p = 0.02$ ).

2. It is suggested to retain three decimal places for the values in Table 1 to ensure consistency with the number of decimal places used in the manuscript.

Respond:

Thank you for your detailed review and valuable feedback on our manuscript. We will follow your suggestion to retain three decimal places for the values in Table 1 to ensure consistency with the number of decimal places used in the manuscript. The following is our change:

|                        | 2020              | 2021              | 2022              | 2023              |
|------------------------|-------------------|-------------------|-------------------|-------------------|
| $AOD_{1640\text{ nm}}$ | $0.028 \pm 0.102$ | $0.026 \pm 0.079$ | $0.050 \pm 0.141$ | $0.016 \pm 0.036$ |

|                          |             |             |             |             |
|--------------------------|-------------|-------------|-------------|-------------|
| AOD <sub>1020 nm</sub>   | 0.049±0.095 | 0.045±0.073 | 0.067±0.131 | 0.040±0.034 |
| AOD <sub>870 nm</sub>    | 0.047±0.093 | 0.039±0.070 | 0.060±0.126 | 0.037±0.032 |
| AOD <sub>675 nm</sub>    | 0.059±0.091 | 0.042±0.068 | 0.063±0.122 | 0.044±0.031 |
| AOD <sub>500 nm</sub>    | 0.074±0.090 | 0.051±0.066 | 0.071±0.117 | 0.053±0.031 |
| AOD <sub>440 nm</sub>    | 0.081±0.089 | 0.057±0.065 | 0.077±0.116 | 0.057±0.031 |
| AOD <sub>380 nm</sub>    | 0.089±0.091 | 0.063±0.065 | 0.077±0.117 | 0.061±0.032 |
| AOD <sub>340 nm</sub>    | 0.088±0.095 | 0.059±0.064 | 0.073±0.118 | 0.058±0.032 |
| AE <sub>440-870 nm</sub> | 1.134±0.411 | 0.953±0.338 | 0.883±0.374 | 0.753±0.206 |

3. 3. There is an error in the reference of Figure 5 in line 224, and it is suggested to be corrected as (Fig.5).

Respond:

Thank you for your detailed review, we have corrected it. The following is our change:

Line 225: ...with each hourly mean containing at least one thousand individual observations (Fig. 5).

4. Please correct the notation of Celsius (°C) in line 84 and Figure 7.

Respond:

Thank you for your detailed review, we have corrected it. The following is our change:

Line 84: The average annual air temperature is -10 °C, with a relative humidity of 58% and prevailing wind speeds of 6.9 m s<sup>-1</sup>, primarily from the east or east-southeast direction (Ding et al., 2022).

Figure 7:



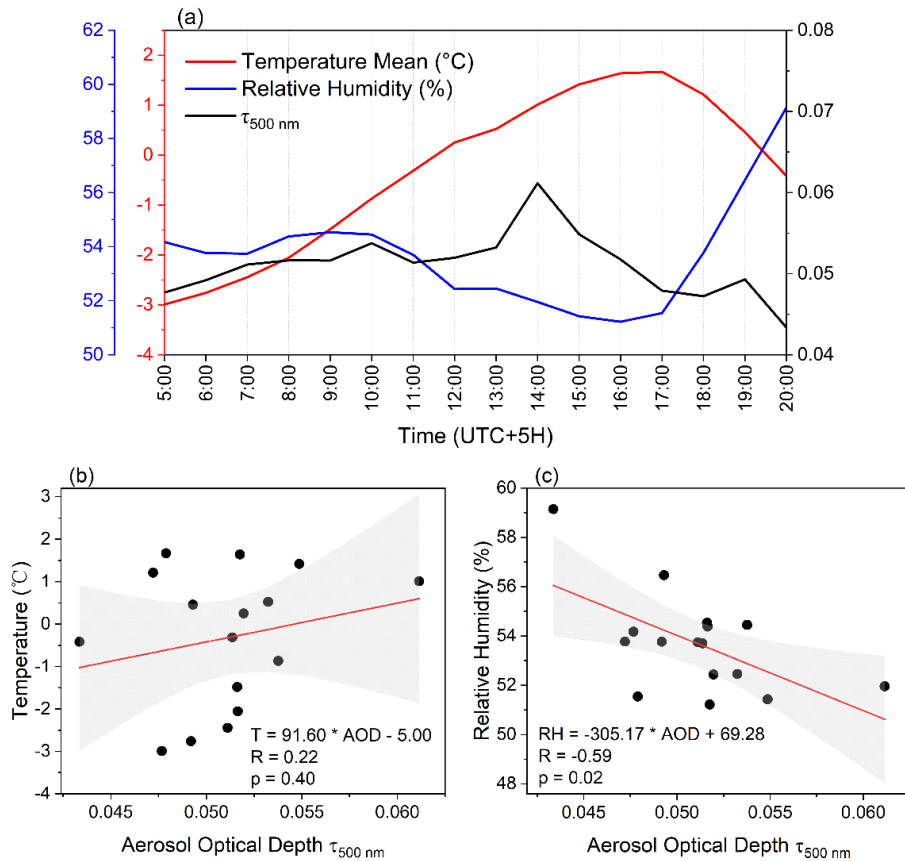

5. In Section 3.2, the authors can make a more natural transition from a discussion of high concentrations of sea salt aerosols in winter as the cause of high AOD to the discussion of DMS and MSA in summer. It is suggested to make some adjustments to the statement.

Respond:

Thank you for your comment. To ensure a more natural transition, we have modified it to:

“In summer, lower sea salt concentrations lead to lower background levels of AOD, but the effect of enhanced marine biogenic emissions on AOD may increase.”

6. When describing Figure 4, the author should explain what the parameters in the figure represent, such as and, it helps the readers understand the following analysis.

Respond:

The explanation of the parameters  $R_{eff}$  and  $\eta$  has been added in line 197-198:

“The solid black line represents the size of fine mode particles ( $R_{eff}$ ), and the dashed blue line represents the proportion of the contribution of fine mode particles to AOD ( $\eta$ ).”

7. In Section 3.3, the authors discussed the relationship between temperature and relative humidity and the diurnal variation of AOD. Is there a physical mechanism to explain the positive or negative impact of temperature and relative humidity changes on aerosol load at Zhongshan Station?

Respond:

At present, there is limited research on the mechanism of local temperature affecting aerosol load in Antarctica. However, by referring to relevant literature exploring the impact of meteorological factors on AOD in the mid-latitudes, we can find a general positive correlation between temperature and AOD. This correlation is attributed to the fact that higher temperatures are conducive to the generation of particulate matter. While our manuscript discusses the potential impacts of temperature and relative humidity on AOD at Zhongshan Station, further research is needed to thoroughly understand the detailed physical mechanisms involved.

8. There are still some grammatical errors in the manuscript. Please revise carefully.

For example:

*Line 99-100: change “eliminate” to “eliminated” for correct tense. Change “exceeding” to “exceedingly” for correct adverb form.*

Respond:

It has been modified into:

“Consequently, we categorize daily observations with less than 20 measurements and the coefficient of dispersion (CV) exceeding 1 as invalid data, which are systematically eliminated from our analysis. Typically, these invalid data manifest with exceedingly high AOD values, often attributed to instrument downtime caused by factors such as precipitation or cloudy weather.”

*Line 225-226: "from 5:00 to 12:00 to the lowest value" can be changed to "from 5:00 to 12:00, reaching the lowest value."*

Respond:

It has been modified into:

**"The mean  $AE_{440-870\text{ nm}}$  decreased from 5:00 to 12:00, to reaching the lowest value ( $0.85 \pm 0.25$ ), and then increased."**

*Line 240: "average speeds range from 2 to 9 m s<sup>-1</sup>" should be changed to "average speeds ranging from 2 to 9 m s<sup>-1</sup>".*

Respond:

It has been modified into:

**"Moreover, the diurnal variation of the 2-minute wind at Zhongshan Station reveals prevailing southeast direction, with average speeds ranging from 2 to 9 m s<sup>-1</sup>."**

*Line 252: "by influencing the air convection and influences the formation" should be "by influencing the air convection and influencing the formation".*

Respond:

It has been modified into:

**"Temperature affects aerosol particle concentration by influencing the air convection and influencing the formation and optical properties of secondary by controlling chemical transformation (Li et al., 2020; Han et al., 2007)."**

9. Some expressions in the manuscript could be further streamlined to enhance the quality of the article. For example:

Line 126-129: The statements "The annual mean  $\pm$  SD values of the AOD<sub>500 nm</sub> were  $0.074 \pm 0.090$ ,  $0.051 \pm 0.066$ ,  $0.071 \pm 0.117$ , and  $0.053 \pm 0.031$  in 2020, 2021, 2022, and 2023, respectively (Table 1)" and "The annual mean  $\pm$  SD values of the  $AE_{440-870\text{ nm}}$

were  $1.134 \pm 0.411$ ,  $0.953 \pm 0.338$ ,  $0.883 \pm 0.374$ ,  $0.753 \pm 0.206$  in 2020, 2021, 2022, and 2023” can be combined into one sentence to reduce redundancy.

Respond:

It has been modified into:

“The annual mean  $\pm$  SD (standard deviation) values of the AOD<sub>500 nm</sub> were  $0.074 \pm 0.090$ ,  $0.051 \pm 0.066$ ,  $0.071 \pm 0.117$ , and  $0.053 \pm 0.031$  in 2020, 2021, 2022, and 2023, respectively (Table 1). Similarly, the annual mean  $\pm$  SD values of the AE<sub>440-870 nm</sub> were  $1.134 \pm 0.411$ ,  $0.953 \pm 0.338$ ,  $0.883 \pm 0.374$ , and  $0.753 \pm 0.206$  for the same years, respectively, suggesting that the aerosols over Zhongshan Station were mainly dominated by fine mode particles in 2020 and by coarse mode particles in 2021, 2022, and 2023.”

Line 270-280: “In addition to meteorological conditions that can affect the diurnal variation characteristics of AOD, we believe that aerosol sources may be another influencing factor” can be simplified to “Besides meteorological conditions, aerosol sources may also influence the diurnal variation characteristics of AOD”.

Respond:

It has been modified into:

“Besides meteorological conditions, aerosol sources may also influence the diurnal variation characteristics of AOD.”

10. The summary section should not rehash the detailed reasons for seasonal variations in AOD and AE, as these have been discussed in the results section. Simplification is recommended.

Respond:

The summary section has been simplified to:

At Zhongshan Station, AOD varied from 0.00 to 0.20. Fine mode particles were predominantly found in the lower AOD range, while higher AOD values were mainly

attributed to coarse mode particles. Seasonally, AOD exhibited a pattern of lower values in summer and higher values in winter, and the AE displayed an opposite trend. The increases in AOD during summer and autumn may be linked to particle growth, whereas the increases during spring and winter are associated with a decline in the fraction of fine mode particles.
